# Supplementary material for: Enhancing lithium storage performance with silicon-based anodes: a theoretical study on transition metal-integrated SiOx/M@C (M = Fe, Co, Ni) heterostructures
Source: Royal Society of Chemistry journal article supplement (doi:10.1039/d4dt02205j), 2024-01-01
Supplement: d4dt02205j1.pdf [file d4dt02205j1.pdf]

## Supplementary Information

Enhancing lithium storage performance with silicon-based anodes: a theoretical study on transition metal-integrated SiO<sub>x</sub>/M@C (M = Fe, Co, Ni) heterostructures

Mianying Huang †<sup>a</sup>, Yueying Chen †<sup>a</sup>, Wenhai Zeng <sup>b</sup>, Yiqing Liu <sup>a</sup>, Zhiguang Xu

<sup>a,\*</sup>, Yongbo Wu <sup>c,d</sup>, Xiaoming Lin <sup>a,\*</sup> Xuan Xu <sup>a</sup>

<sup>a</sup> *Key Laboratory of Theoretical Chemistry of Environment, Ministry of Education, School of Chemistry, South China Normal University, Guangzhou 510006, China.*

<sup>b</sup> *College of City Construction, Jiangxi Normal University, Nanchang 330022, P. R. China.*

<sup>c</sup> *Key Laboratory of Atomic and Subatomic Structure and Quantum Control (Ministry of Education), Guangdong Basic Research Center of Excellence for Structure and Fundamental Interactions of Matter, School of Physics, South China Normal University, Guangzhou 510006, China.*

<sup>d</sup> *Guangdong Provincial Key Laboratory of Quantum Engineering and Quantum Materials, Guangdong-Hong Kong Joint Laboratory of Quantum Matter, South China Normal University, Guangzhou 510006, China.*

† *These authors contributed equally to this work.*

---

*\*Author to whom correspondence should be addressed: E-mail: chzgxu@scnu.edu.cn; linxm@scnu.edu.cn.*

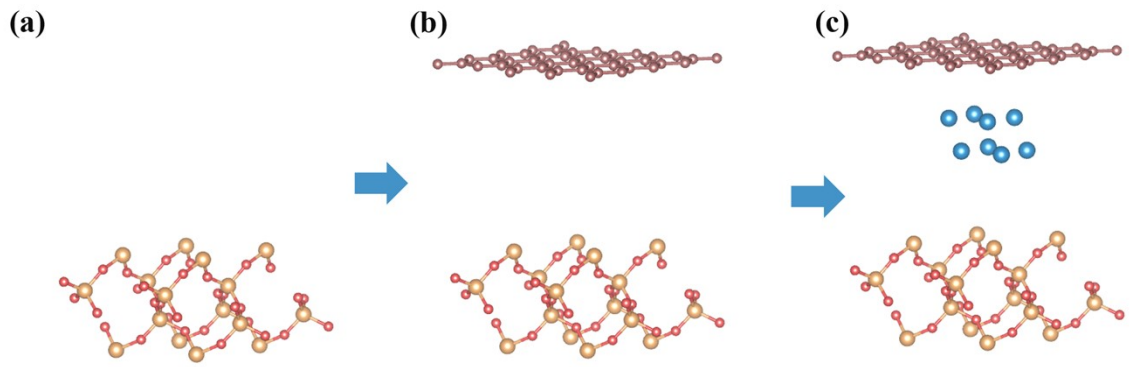

**Fig. S1** Geometrically optimized structures of (a)  $\text{SiO}_2$ ; (b)  $\text{SiO}_2@C$ ; (c)  $\text{SiO}_2/M@C$ .

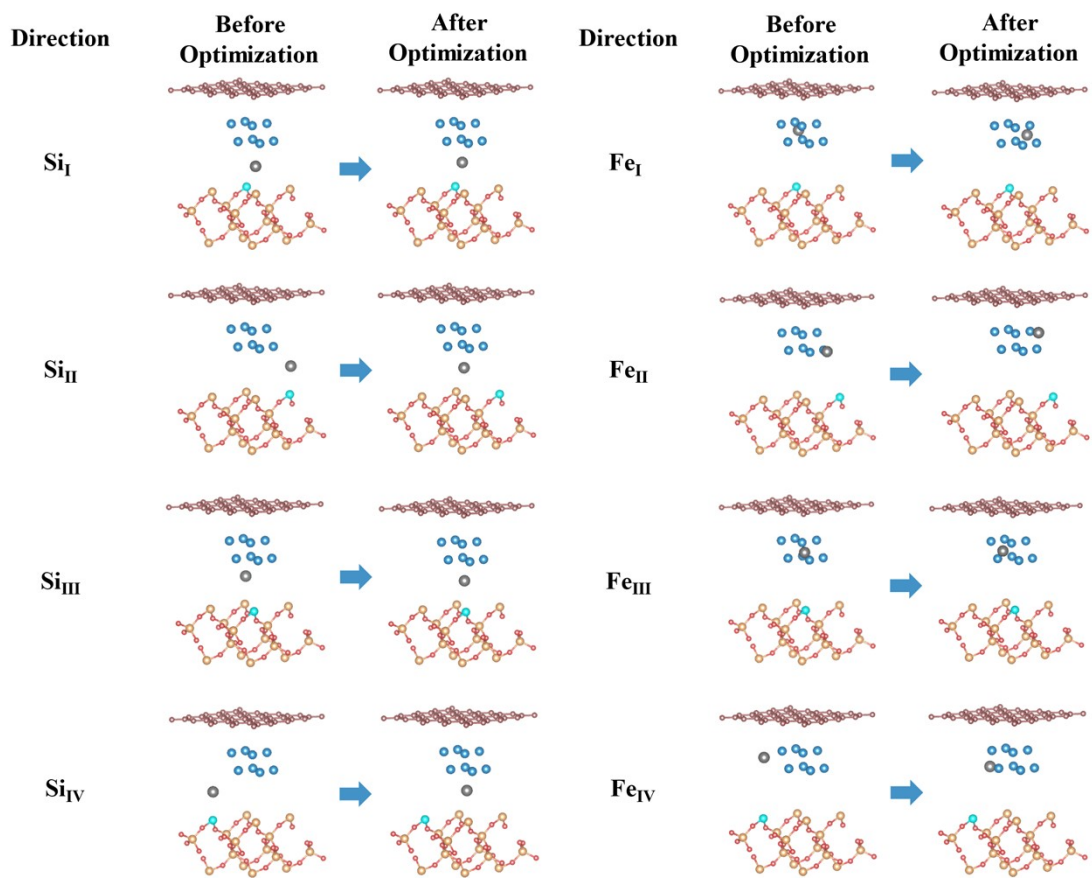

**Fig. S2** Configurations before and after optimization of all directions for  $\text{SiO}_x/\text{Fe}@C$ .

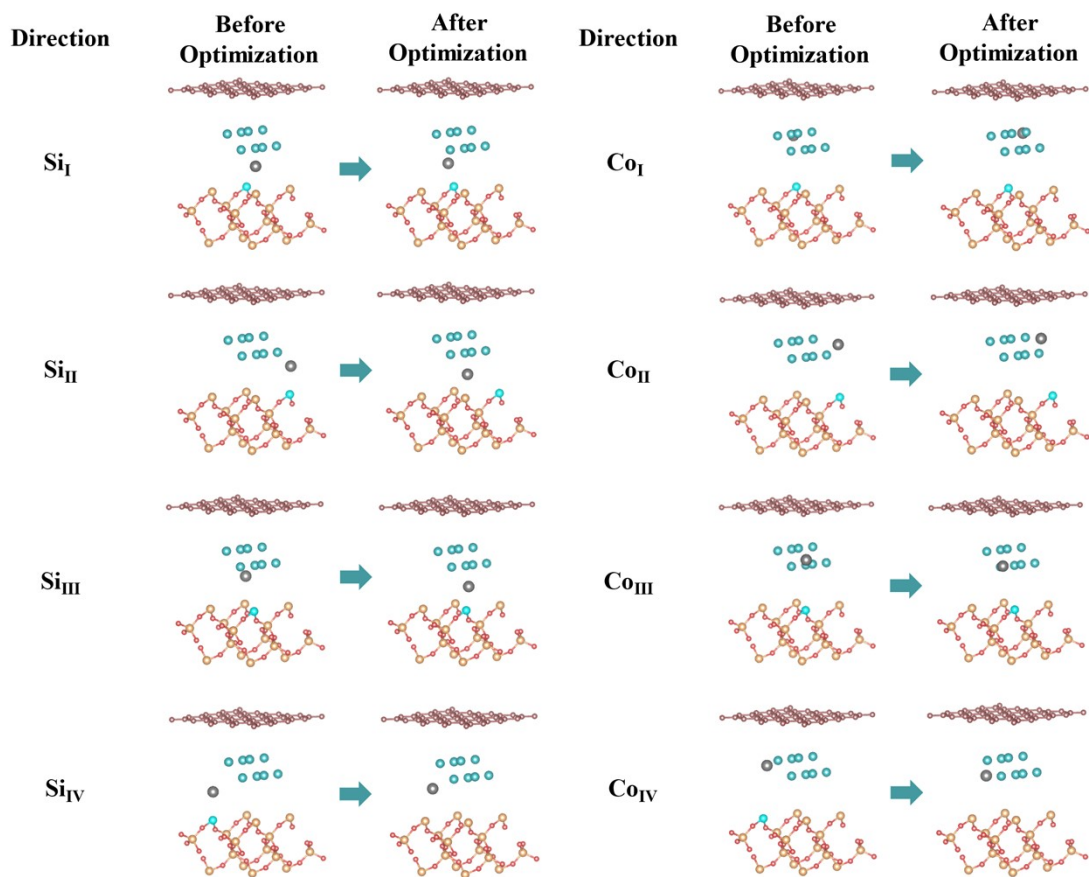

**Fig. S3** Configurations before and after optimization of all directions for SiO<sub>x</sub>/Co@C.

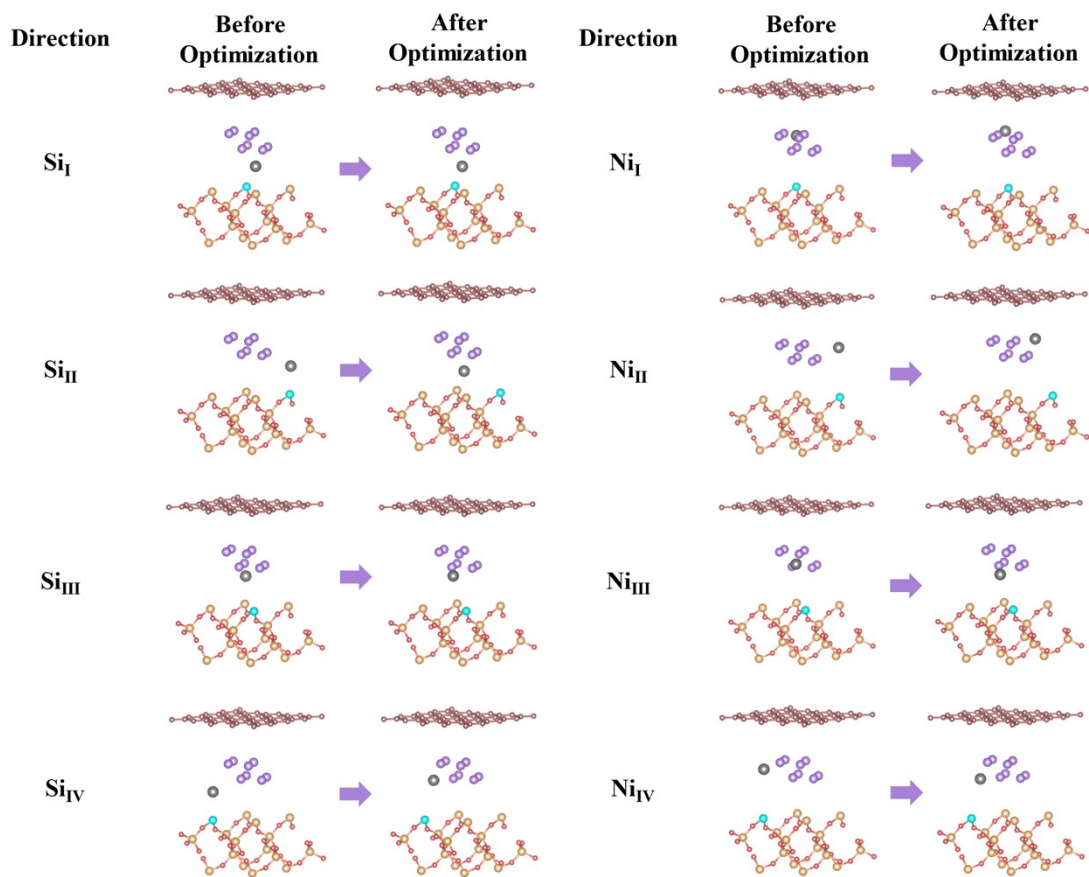

**Fig. S4** Configurations before and after optimization of all directions for  $\text{SiO}_x/\text{Ni}@C$ .

**Table S1** The energies of  $E(\text{SiO}_x/\text{M}@C)$ ,  $E(\text{SiO}_x@C)$ , and  $E(M)$ .

| Compound                   | Energy/eV   |
|----------------------------|-------------|
| $\text{SiO}_x/\text{Fe}@C$ | -24099.0845 |
| $\text{SiO}_x/\text{Co}@C$ | -25524.3973 |
| $\text{SiO}_x/\text{Ni}@C$ | -28019.2597 |
| $\text{SiO}_x@C$           | -17200.865  |
| Fe                         | -6913.93799 |
| Co                         | -8327.92068 |
| Ni                         | -6901.50753 |
| Li                         | -188.143764 |

**Table S2** The energies of  $E(\text{Li} + \text{SiO}_x/\text{M}@\text{C})$ .

| Material                  | Direction         | $\Delta E_a/\text{eV}$ | Direction         | $\Delta E_a/\text{eV}$ |
|---------------------------|-------------------|------------------------|-------------------|------------------------|
| Li+SiO <sub>x</sub> /Fe@C | Si <sub>I</sub>   | -24289.6282            | Fe <sub>I</sub>   | -24289.5908            |
|                           | Si <sub>II</sub>  | -24289.6282            | Fe <sub>II</sub>  | -24289.3222            |
|                           | Si <sub>III</sub> | -24289.6281            | Fe <sub>III</sub> | -24289.6031            |
|                           | Si <sub>IV</sub>  | -24289.6288            | Fe <sub>IV</sub>  | -24289.6031            |
| Li+SiO <sub>x</sub> /Co@C | Si <sub>I</sub>   | -25714.9522            | Co <sub>I</sub>   | -25714.9236            |
|                           | Si <sub>II</sub>  | -25715.0467            | Co <sub>II</sub>  | -25714.9237            |
|                           | Si <sub>III</sub> | -25715.0462            | Co <sub>III</sub> | -25714.9239            |
|                           | Si <sub>IV</sub>  | -25714.6591            | Co <sub>IV</sub>  | -25714.9218            |
| Li+SiO <sub>x</sub> /Ni@C | Si <sub>I</sub>   | -28210.2236            | Ni <sub>I</sub>   | -28209.6864            |
|                           | Si <sub>II</sub>  | -28210.1111            | Ni <sub>II</sub>  | -28209.9026            |
|                           | Si <sub>III</sub> | -28209.8913            | Ni <sub>III</sub> | -28209.8906            |
|                           | Si <sub>IV</sub>  | -28209.9019            | Ni <sub>IV</sub>  | -28209.9022            |
